# The American Journal of Psychiatry

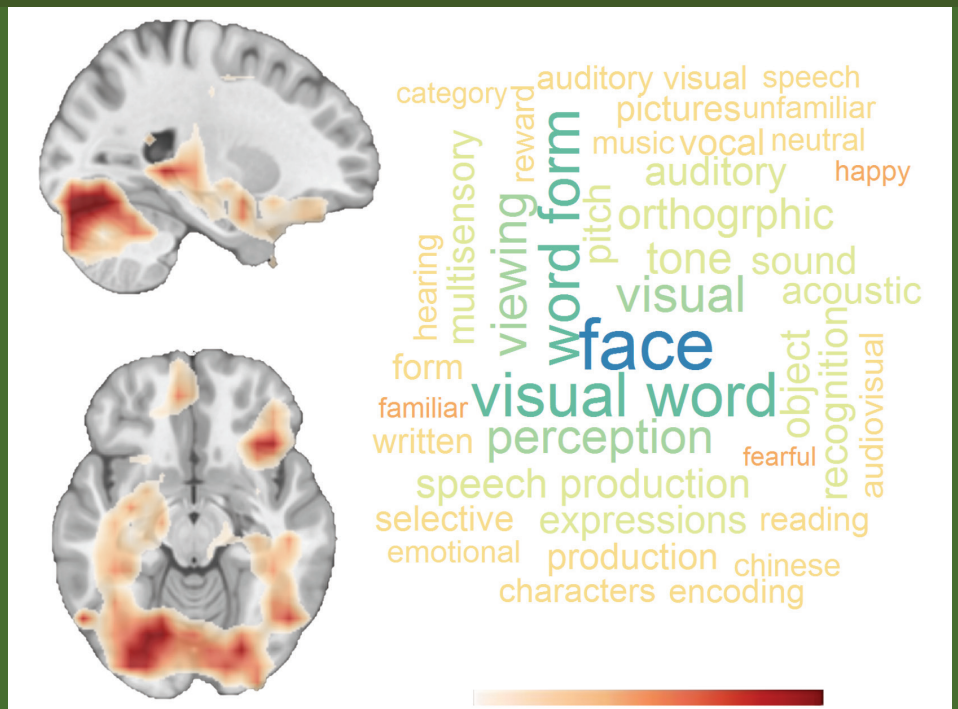

The Link Between Autism and Sex-Related Neuroanatomy,  
and Associated Cognition and Gene Expression

In Search of Biomarkers to Guide Interventions  
in Autism Spectrum Disorder

The Autism Biomarkers Consortium for Clinical Trials:  
Initial Evaluation of a Battery of Candidate EEG Biomarkers

Resting-State Connectivity and Response to Psychotherapy  
Treatment in Adolescents and Adults With OCD
